# Supplementary material
Source: publisher figshare collection journal article supplement (https://plos.figshare.com/articles/dataset/_/1600585)
Supplement: Supplementary file [file 1]

|                                |                       | Deep Red pummelo |                | Reinking pummelo |                | Tahiti pummelo |              | Chandler pummelo |              |        |
|--------------------------------|-----------------------|------------------|----------------|------------------|----------------|----------------|--------------|------------------|--------------|--------|
|                                |                       | Peel             | Pulp           | Peel             | Pulp           | Peel           | Pulp         | Peel             | Pulp         |        |
| <b>Coumarins</b>               |                       |                  |                |                  |                |                |              |                  |              |        |
| Umbelliferone                  |                       |                  |                |                  |                |                |              |                  |              |        |
| Osthol                         |                       | 16.66 ± 3.83     | 0.18 ± 0.08    | 8.92 ± 3.27      | Traces         | 22.18 ± 9.81   | Traces       | 1.46 ± 0.39      | Traces       |        |
| Aurapten                       |                       | 7.15 ± 0.47      | 2.98 ± 1.31    | 15.17 ± 7.62     | 1.46 ± 0.68    | 16.87 ± 4.29   | Traces       | 39.34 ± 15.12    | 2.12 ± 0.88  |        |
| Epoxyaurapten                  |                       | 21.99 ± 2.50     |                | 60.34 ± 8.17     |                | 133.19 ± 25.75 | Traces       | 10.45 ± 1.46     |              |        |
| Limettin                       |                       |                  |                | 2.86 ± 0.45      |                | 2.56 ± 0.79    | 2.79 ± 0.86  | 1.96 ± 0.12      | Traces       |        |
| 5-geranyloxy-7-methoxycoumarin |                       |                  |                | Detected         |                | Detected       |              |                  |              |        |
| <b>Furanocoumarins</b>         |                       |                  |                |                  |                |                |              |                  |              |        |
| Psoralen                       |                       | Traces           |                |                  |                |                |              |                  |              |        |
| Bergapten cluster              | Bergaptol             | Traces           |                |                  |                |                |              |                  | 13.83 ± 2.11 | Traces |
|                                | Bergapten             |                  |                |                  |                |                |              |                  | 26.80 ± 7.28 | Traces |
|                                | Isoimperatorin        | 27.95 ± 8.41     | 132.66 ± 40.93 | 74.66 ± 33.80    | 26.26 ± 8.22   | Traces         | Traces       |                  | Traces       |        |
|                                | Oxypeucedanin         | 31.22 ± 10.29    | 4.96 ± 2.58    | 34.12 ± 5.54     | 17.02 ± 8.95   | 0.68 ± 0.16    | 0.77 ± 0.28  | 0.90 ± 0.12      | 0.59 ± 0.07  |        |
|                                | Oxypeucedanin hydrate | 9.98 ± 0.67      | 21.74 ± 7.52   | 9.51 ± 2.77      | 25.67 ± 3.63   |                |              |                  |              |        |
|                                | Bergamottin           | 0.24 ± 0.05      | 0.46 ± 0.19    | 3.24 ± 1.03      | Traces         | 14.66 ± 6.76   | 2.62 ± 1.83  | 1.48 ± 0.75      | 12.33 ± 5.67 |        |
|                                | Epoxybergamottin      | 9.31 ± 3.00      |                | 82.41 ± 37.55    | Traces         | 77.31 ± 20.18  | 21.03 ± 9.58 | 10.76 ± 1.19     | 5.28 ± 1.06  |        |
| 6',7'-dihydroxybergamottin     | 13.36 ± 3.07          | 19.45 ± 7.01     | 34.55 ± 10.84  | 6.59 ± 2.18      | 108.56 ± 40.20 | 24.42 ± 12.07  | 60.27 ± 4.52 | 38.14 ± 6.77     |              |        |
| Xanthotoxin cluster            | Xanthotoxol           |                  |                |                  |                |                |              |                  |              |        |
|                                | Xanthotoxin           |                  |                |                  |                |                |              |                  |              |        |
|                                | Imperatorin           | Traces           | 10.38 ± 1.08   | Traces           | 21.33 ± 1.48   |                |              |                  |              |        |
|                                | Heraclenin            |                  |                |                  |                |                |              |                  |              |        |
| Isopimpinellin cluster         | Heraclenol            |                  |                |                  |                |                |              |                  |              |        |
|                                | 8-geranyloxypsoralen  | 1.47 ± 0.05      | 2.43 ± 0.75    | 4.02 ± 0.95      | Traces         | 15.29 ± 8.18   | Traces       | 2.59 ± 0.63      | 2.52 ± 0.96  |        |
|                                | Isopimpinellin        |                  |                |                  |                |                |              |                  |              |        |
|                                | Phellopterin          |                  |                |                  |                |                |              |                  |              |        |
| Isopimpinellin cluster         | Byakangelicol         | 0.65 ± 0.19      | 3.26 ± 0.67    | Traces           | Traces         | Traces         | Traces       | 0.54 ± 0.05      | Traces       |        |
|                                | Byakangelicin         |                  |                |                  |                |                |              |                  |              |        |
|                                | Cnidilin              |                  | 0.71 ± 0.15    |                  | Traces         |                |              |                  |              |        |
|                                | Cnidicin              | 9.20 ± 2.14      | 24.46 ± 5.30   | 14.17 ± 1.94     | 9.63 ± 4.25    |                |              |                  |              |        |
| TOTAL (mg.kg <sup>-1</sup> )   |                       | 149.18           | 223.67         | 343.97           | 107.96         | 391.30         | 51.63        | 170.38           | 60.98        |        |

|                              |                                | Sans pépin pummelo |               | Kao Pan pummelo |               | Pink pummelo  |              |
|------------------------------|--------------------------------|--------------------|---------------|-----------------|---------------|---------------|--------------|
|                              |                                | Peel               | Pulp          | Peel            | Pulp          | Peel          | Pulp         |
|                              | <b>Coumarins</b>               |                    |               |                 |               |               |              |
|                              | Umbelliferone                  | Traces             |               |                 |               |               |              |
|                              | Osthol                         | 27.84 ± 8.70       | 0.19 ± 0.06   | 1.69 ± 0.63     | Traces        | 20.69 ± 6.25  | Traces       |
|                              | Aurapten                       | 11.28 ± 4.91       | 0.36 ± 0.12   | 33.46 ± 9.80    | 0.69 ± 0.16   | 41.92 ± 16.85 | 9.09 ± 4.04  |
|                              | Epoxyaurapten                  | 11.99 ± 2.77       |               | 39.78 ± 9.29    |               | 32.20 ± 14.87 |              |
|                              | Limettin                       | 1.68 ± 0.48        | Traces        | 1.62 ± 0.30     |               | 1.96 ± 0.57   |              |
|                              | 5-geranyloxy-7-methoxycoumarin |                    |               |                 |               |               |              |
|                              |                                | Detected           |               |                 |               |               |              |
| <b>Furanocoumarins</b>       |                                |                    |               |                 |               |               |              |
| Psoralen                     |                                |                    |               |                 |               |               |              |
| Bergapten cluster            | Bergaptol                      | 2.38 ± 0.68        |               |                 |               |               |              |
|                              | Bergapten                      |                    |               |                 |               |               |              |
|                              | Isoimperatorin                 | 67.61 ± 13.52      | 88.39 ± 51.26 | 20.58 ± 3.58    |               | 22.91 ± 2.58  | 12.09 ± 2.19 |
|                              | Oxypeucedanin                  | 37.38 ± 6.62       | 5.08 ± 1.42   | Traces          | 0.33 ± 0.07   | Traces        | Traces       |
|                              | Oxypeucedanin hydrate          | 11.68 ± 5.08       | 4.50 ± 1.71   |                 |               |               | 0.60 ± 0.13  |
|                              | Bergamottin                    | 0.20 ± 0.09        | 0.09 ± 0.04   | 0.58 ± 0.20     | 6.77 ± 2.64   | 2.55 ± 0.88   | 1.46 ± 0.65  |
| Xanthotoxin cluster          | Epoxybergamottin               | 11.30 ± 5.80       | Traces        | 51.57 ± 17.58   | Traces        | 17.35 ± 2.85  | 17.89 ± 8.11 |
|                              | 6',7'-dihydroxybergamottin     | 18.34 ± 8.02       | 5.61 ± 2.05   | 56.03 ± 22.27   | 34.41 ± 12.23 | 50.40 ± 8.55  | Traces       |
|                              | Xanthotoxol                    |                    |               |                 |               |               |              |
|                              | Xanthotoxin                    |                    |               |                 |               |               |              |
|                              | Imperatorin                    | 4.71 ± 2.09        |               |                 |               |               |              |
|                              | Heraclenin                     |                    |               |                 |               |               |              |
| Isopimpinellin cluster       | Heraclenol                     |                    |               |                 |               |               |              |
|                              | 8-geranyloxypsoralen           | Traces             | Traces        | 2.40 ± 0.64     |               | 1.75 ± 0.29   | 3.52 ± 0.70  |
|                              | Isopimpinellin                 |                    |               |                 |               |               |              |
|                              | Phellopterin                   |                    |               |                 |               |               |              |
|                              | Byakangelicol                  |                    |               |                 |               |               |              |
|                              | Byakangelicin                  |                    |               |                 |               |               |              |
| TOTAL (mg.kg <sup>-1</sup> ) |                                | 199.30             | 123.84        | 207.71          | 42.20         | 191.73        | 194.62       |

**Tables A. Concentration (in mg.kg-1 fresh weight ± standard deviation) of the coumarins and the furanocoumarins in the pummelos peel and pulp extracts.** The mention « Traces » is used for compounds that could be detected but not quantitated (3 < S/N < 10) while « Detected » is used when 5-geranyloxy-7-methoxycoumarin was identified in the samples.

|                                |                            | Corsican citron |             | Etrog citron   |             | Buddha's Hand citron |      |
|--------------------------------|----------------------------|-----------------|-------------|----------------|-------------|----------------------|------|
|                                |                            | Peel            | Pulp        | Peel           | Pulp        | Peel                 | Pulp |
| <b>Coumarins</b>               |                            |                 |             |                |             |                      |      |
| Umbelliferone                  |                            |                 | 0.20 ± 0.01 |                |             |                      |      |
| Osthol                         |                            |                 |             |                |             |                      |      |
| Aurapteren                     |                            | 0.56 ± 0.08     | 0.40 ± 0.15 | 0.49 ± 0.11    | 0.36 ± 0.07 | 0.68 ± 0.21          |      |
| Epoxyaurapteren                |                            |                 |             |                |             |                      |      |
| Limettin                       |                            | 3.92 ± 0.54     | 0.66 ± 0.09 | 198.95 ± 20.55 | 1.33 ± 0.09 | 152.25 ± 24.24       |      |
| 5-geranyloxy-7-methoxycoumarin |                            | Detected        | Detected    | Detected       | Detected    | Detected             |      |
| <b>Furanocoumarins</b>         |                            |                 |             |                |             |                      |      |
| Psoralen                       |                            |                 |             |                |             |                      |      |
| Bergapten cluster              | Bergaptol                  |                 |             |                |             |                      |      |
|                                | Bergapten                  | 2.57 ± 0.44     | 0.35 ± 0.02 | 8.83 ± 2.30    | 0.85 ± 0.18 | 6.54 ± 0.83          |      |
|                                | Isoimperatorin             | 0.96 ± 0.09     | Traces      | 4.44 ± 0.87    | Traces      | 3.09 ± 0.81          |      |
|                                | Oxypeucedanin              | 1.32 ± 0.22     | 0.42 ± 0.02 | 40.84 ± 9.30   | 0.19 ± 0.00 | 13.83 ± 3.67         |      |
|                                | Oxypeucedanin hydrate      | 0.48 ± 0.08     | 0.21 ± 0.05 | 16.47 ± 3.72   | 0.16 ± 0.01 | 6.18 ± 0.64          |      |
|                                | Bergamottin                |                 |             |                |             |                      |      |
|                                | Epoxybergamottin           |                 |             |                |             |                      |      |
|                                | 6',7'-dihydroxybergamottin |                 |             |                |             |                      |      |
| Xanthoxin cluster              | Xanthotoxol                |                 |             |                |             |                      |      |
|                                | Xanthotoxin                |                 |             |                |             |                      |      |
|                                | Imperatorin                | 3.95 ± 0.96     | 0.26 ± 0.06 | 2.98 ± 0.89    | 0.21 ± 0.02 | Traces               |      |
|                                | Heraclenin                 | 18.79 ± 2.68    | 0.21 ± 0.05 | 4.15 ± 1.57    | Traces      | 0.66 ± 0.15          |      |
|                                | Heraclenol                 | 7.23 ± 1.40     |             | 7.44 ± 1.20    |             | Traces               |      |
|                                | 8-geranyloxypsoralen       |                 |             |                |             |                      |      |
| Isopimpinellin cluster         | Isopimpinellin             | 1.78 ± 0.16     | 0.33 ± 0.03 | 5.30 ± 0.50    | 0.68 ± 0.05 | 6.66 ± 0.51          |      |
|                                | Phellopterin               | 5.10 ± 0.75     | Traces      | 15.91 ± 2.67   |             | 1.94 ± 0.15          |      |
|                                | Byakangelicol              | 13.33 ± 2.85    | 0.06 ± 0.01 | 34.86 ± 9.17   |             | 10.11 ± 1.21         |      |
|                                | Byakangelicin              | 22.40 ± 5.92    |             | 29.38 ± 12.05  |             | Traces               |      |
|                                | Cnidilin                   |                 |             |                |             |                      |      |
|                                | Cnidicin                   | Traces          |             | 5.10 ± 1.22    |             | Traces               |      |
| TOTAL (mg.kg <sup>-1</sup> )   |                            | 82.39           | 3.10        | 375.14         | 3.78        | 201.94               |      |

**Table B. Concentration (in mg.kg<sup>-1</sup> fresh weight ± standard deviation) of the coumarins and the furanocoumarins in the citrons peel and pulp extracts.** The mention « Traces » is used for compounds that could be detected but not quantitated (3 < S/N < 10) while « Detected » is used when 5-geranyloxy-7-methoxycoumarin was identified in the samples. No data could be obtained for the pulp of Buddha's hand citron as the fruits of this citrus species did not contain pulp.

|                                |                            | Micrantha       |               | Combava        |               | Ichang papeda |             |
|--------------------------------|----------------------------|-----------------|---------------|----------------|---------------|---------------|-------------|
|                                |                            | Peel            | Pulp          | Peel           | Pulp          | Peel          | Pulp        |
| <b>Coumarins</b>               |                            |                 |               |                |               |               |             |
| Umbelliferone                  |                            |                 |               |                |               |               |             |
| Osthol                         |                            |                 |               |                |               |               |             |
| Auraptén                       |                            | 4.03 ± 1.43     | 1.66 ± 0.49   | 1.00 ± 0.09    | 0.52 ± 0.10   | 1.45 ± 0.65   | 1.57 ± 0.85 |
| Epoxyauraptén                  |                            |                 |               |                |               |               |             |
| Limettin                       |                            | 2.93 ± 0.42     | 2.27 ± 0.43   | 14.39 ± 3.52   | 4.92 ± 0.43   | 11.16 ± 2.99  | 2.65 ± 0.38 |
| 5-geranyloxy-7-methoxycoumarin |                            | Detected        | Detected      | Detected       | Detected      |               | Detected    |
| <b>Furanocoumarins</b>         |                            |                 |               |                |               |               |             |
| Psoralén                       |                            |                 |               | Traces         | 0.19 ± 0.02   |               |             |
| Bergapten cluster              | Bergaptol                  | 21.54 ± 10.22   | 13.31 ± 3.06  | 25.85 ± 8.59   | 57.98 ± 2.64  |               |             |
|                                | Bergapten                  | 728.32 ± 165.98 | 32.41 ± 8.66  | 17.28 ± 4.12   | 4.86 ± 0.64   | 7.58 ± 1.81   | 1.53 ± 0.53 |
|                                | Isoimperatorin             | 21.61 ± 3.43    | 1.46 ± 0.41   | 18.36 ± 3.61   | 3.65 ± 0.53   |               |             |
|                                | Oxypeucedanin              | 274.97 ± 93.72  | 6.19 ± 1.87   | 895.14 ± 65.03 | 16.97 ± 1.39  | Traces        | 0.31 ± 0.07 |
|                                | Oxypeucedanin hydrate      | 71.52 ± 11.68   | 19.40 ± 7.38  | 107.49 ± 14.01 | 95.12 ± 14.69 |               |             |
|                                | Bergamottin                | 47.23 ± 10.57   | 28.49 ± 11.65 | 23.07 ± 3.19   | 29.40 ± 1.92  | Traces        | 0.28 ± 0.11 |
|                                | Epoxybergamottin           | 108.42 ± 44.67  | 12.43 ± 3.11  | 485.91 ± 23.72 | 53.70 ± 7.92  |               |             |
|                                | 6',7'-dihydroxybergamottin | 111.39 ± 19.60  | 28.08 ± 10.60 | 314.38 ± 51.12 | 82.63 ± 19.44 |               |             |
| Xanthoxin cluster              | Xanthotoxol                | 4.37 ± 1.52     | 3.90 ± 1.46   |                |               |               |             |
|                                | Xanthotoxin                | 32.26 ± 5.26    | 6.87 ± 2.18   | 0.47 ± 0.15    |               |               |             |
|                                | Imperatorin                | Traces          |               |                |               |               |             |
|                                | Heraclénin                 |                 |               |                |               |               |             |
|                                | Heraclénol                 |                 |               |                |               |               |             |
|                                | 8-geranyloxypsoralén       | 420.99 ± 195.40 | 70.78 ± 22.45 |                |               |               |             |
| Isopimpinellin cluster         | Isopimpinellin             | 694.07 ± 298.76 | 65.63 ± 19.96 | 5.33 ± 1.03    | 2.12 ± 0.47   | 5.09 ± 0.49   | 2.09 ± 0.70 |
|                                | Phellopterin               | 13.51 ± 2.69    | 3.90 ± 0.37   |                |               |               |             |
|                                | Byakangelicol              | 107.27 ± 37.92  | 5.56 ± 0.95   |                |               |               |             |
|                                | Byakangelicin              |                 |               |                |               |               |             |
|                                | Cnidilin                   | 113.40 ± 16.07  | 13.10 ± 4.23  |                |               |               |             |
|                                | Cnidicin                   |                 |               |                |               |               |             |
| TOTAL (mg.kg <sup>-1</sup> )   |                            | 2777.83         | 315.44        | 1908.67        | 352.06        | 25.28         | 8.43        |

**Table C. Concentration (in mg.kg<sup>-1</sup> fresh weight ± standard deviation) of the coumarins and the furanocoumarins in the papedas peel and pulp extracts.** The mention « Traces » is used for compounds that could be detected but not quantitated (3 < S/N < 10) while « Detected » is used when 5-geranyloxy-7-methoxycoumarin was identified in the samples.

|                              |                            | Willowleaf mandarin |        | Fuzhu mandarin |             | San Hu Hong Chu mandarin |             | Nan Feng Mi Ju mandarin |             |
|------------------------------|----------------------------|---------------------|--------|----------------|-------------|--------------------------|-------------|-------------------------|-------------|
|                              |                            | Peel                | Pulp   | Peel           | Pulp        | Peel                     | Pulp        | Peel                    | Pulp        |
|                              | <b>Coumarins</b>           |                     |        |                |             |                          |             |                         |             |
|                              | Umbelliferone              |                     |        |                |             |                          |             |                         |             |
|                              | Osthol                     |                     |        |                |             |                          |             |                         |             |
|                              | Aurapten                   | Traces              |        | 0.31 ± 0.11    | 0.11 ± 0.02 | 0.30 ± 0.07              | 0.14 ± 0.04 | 1.41 ± 0.24             | 0.29 ± 0.07 |
|                              | Epoxyaurapten              | 1.18 ± 0.28         |        | 0.25 ± 0.06    | 5.44 ± 1.00 | 0.59 ± 0.19              | 3.68 ± 1.70 | 0.52 ± 0.13             | 3.17 ± 0.47 |
|                              | Limettin                   |                     |        |                | Detected    | Detected                 | Detected    |                         | 0.35 ± 0.02 |
|                              | <b>Furanocoumarins</b>     |                     |        |                |             |                          |             |                         |             |
|                              | Psoralen                   |                     |        |                |             |                          |             |                         |             |
| Bergapten cluster            | Bergaptol                  | Traces              |        | 4.72 ± 0.77    | 0.81 ± 0.06 | 3.74 ± 1.82              | 0.49 ± 0.07 | 2.71 ± 0.57             | 0.30 ± 0.06 |
|                              | Bergapten                  | 0.36 ± 0.05         |        | 0.22 ± 0.05    | 1.95 ± 0.44 | 0.20 ± 0.04              | 1.42 ± 0.64 | 0.15 ± 0.01             | 0.22 ± 0.02 |
|                              | Isoimperatorin             |                     |        |                |             |                          |             | 0.32 ± 0.05             | 0.38 ± 0.06 |
|                              | Oxypeucedanin              |                     |        |                |             |                          |             | Traces                  |             |
|                              | Oxypeucedanin hydrate      |                     |        |                |             |                          |             |                         |             |
|                              | Bergamottin                |                     |        | 0.36 ± 0.14    | 0.06 ± 0.03 |                          | 0.07 ± 0.03 |                         |             |
| Xanthotoxin cluster          | Epoxybergamottin           |                     |        |                |             |                          |             |                         |             |
|                              | 6',7'-dihydroxybergamottin |                     |        |                |             |                          |             |                         |             |
|                              | Xanthotoxol                |                     |        |                |             |                          |             |                         |             |
|                              | Xanthotoxin                |                     |        |                |             |                          |             |                         |             |
|                              | Imperatorin                |                     |        |                |             |                          |             |                         |             |
|                              | Heraclenin                 |                     |        |                |             |                          |             |                         |             |
| Isopimpinellin cluster       | Heraclenol                 |                     |        |                |             |                          |             |                         |             |
|                              | 8-geranyloxypsoralen       |                     |        |                |             |                          |             |                         |             |
|                              | Isopimpinellin             | Traces              | Traces | 2.69 ± 0.32    | 0.55 ± 0.18 | 2.11 ± 0.95              | 0.33 ± 0.03 | 5.02 ± 0.42             | 1.88 ± 0.36 |
|                              | Phellopterin               |                     |        |                |             |                          |             |                         |             |
|                              | Byakangelicol              |                     |        |                |             |                          |             |                         |             |
|                              | Byakangelicin              |                     |        |                |             |                          |             |                         |             |
| TOTAL (mg.kg <sup>-1</sup> ) |                            | 1.54                | 0.47   | 15.47          | 2.32        | 11.25                    | 2.02        | 13.46                   | 3.42        |

|                              |                             | Beauty mandarin |        | Dancy mandarin |             | Wase Satsuma |             | Owari Satsuma |             |
|------------------------------|-----------------------------|-----------------|--------|----------------|-------------|--------------|-------------|---------------|-------------|
|                              |                             | Peel            | Pulp   | Peel           | Pulp        | Peel         | Pulp        | Peel          | Pulp        |
|                              | <b>Coumarins</b>            |                 |        |                |             |              |             |               |             |
|                              | Umbelliferone               |                 |        |                |             |              |             |               |             |
|                              | Osthol                      |                 |        |                |             |              |             |               |             |
|                              | Aurapten                    |                 |        |                |             | 0.63 ± 0.12  | 0.26 ± 0.05 | 0.64 ± 0.07   | 0.15 ± 0.05 |
|                              | Epoxyaurapten               | 1.53 ± 0.47     |        | 0.27 ± 0.13    | 7.97 ± 0.52 | 0.53 ± 0.12  | 2.11 ± 0.25 | 0.43 ± 0.08   | 2.93 ± 0.47 |
|                              | Limettin                    |                 |        |                |             |              |             | Detected      | 0.43 ± 0.15 |
|                              | <b>Furanocoumarins</b>      |                 |        |                |             |              |             |               |             |
|                              | Psoralen                    |                 |        |                |             |              |             |               |             |
| Bergapten cluster            | Bergaptol                   | Traces          |        | 4.85 ± 0.40    | Traces      | 2.12 ± 0.30  | 0.56± 0.06  | 2.54 ± 0.17   | Traces      |
|                              | Bergapten                   | 0.35 ± 0.09     |        | 0.34 ± 0.10    | Traces      | Traces       | 0.88 ± 0.13 | 0.25 ± 0.04   | 0.28 ± 0.04 |
|                              | Isoimperatorin              |                 |        |                |             |              |             | Traces        | Traces      |
|                              | Oxypeucedanin               |                 |        |                |             |              |             |               |             |
|                              | Oxypeucedanin hydrate       |                 |        |                |             |              |             |               |             |
|                              | Bergamottin                 |                 |        |                |             |              |             |               |             |
| Xanthotoxin cluster          | Epoxybergamottin            |                 |        |                |             | Traces       | 0.80 ± 0.09 | 2.73 ± 0.52   | 1.10 ± 0.23 |
|                              | 6', 7'-dihydroxybergamottin |                 |        |                |             |              |             |               |             |
|                              | Xanthotoxol                 |                 |        |                |             |              |             |               |             |
|                              | Xanthotoxin                 |                 |        |                |             |              |             |               |             |
|                              | Imperatorin                 |                 |        |                |             |              |             |               |             |
|                              | Heraclenin                  |                 |        |                |             |              |             |               |             |
| Isopimpinellin cluster       | Heraclenol                  |                 |        |                |             |              |             |               |             |
|                              | 8-geranyloxypsoralen        |                 |        |                |             |              |             |               |             |
|                              | Isopimpinellin              | Traces          | Traces | 2.37 ± 0.13    | 0.27 ± 0.04 | 1.10 ± 0.14  | 0.36 ± 0.03 | 1.41 ± 0.08   | 0.34 ± 0.09 |
|                              | Phellopterin                |                 |        |                |             |              |             |               |             |
|                              | Byakangelicol               |                 |        |                |             |              |             |               |             |
|                              | Byakangelicin               |                 |        |                |             |              |             |               |             |
| TOTAL (mg.kg <sup>-1</sup> ) |                             | 1.88            | 0.61   | 15.19          | 0.80        | 6.84         | 2.66        | 11.31         | 2.30        |

|                              |                             | Sunki mandarin |             | Shekwasha mandarin |               | Cleopatra mandarin |             |
|------------------------------|-----------------------------|----------------|-------------|--------------------|---------------|--------------------|-------------|
|                              |                             | Peel           | Pulp        | Peel               | Pulp          | Peel               | Pulp        |
|                              | <b>Coumarins</b>            |                |             |                    |               |                    |             |
|                              | Umbelliferone               |                |             |                    |               |                    |             |
|                              | Osthol                      |                |             |                    |               |                    |             |
|                              | Aurapten                    |                |             | Traces             | 0.73 ± 0.37   | 0.18 ± 0.05        |             |
|                              | Epoxyaurapten               | 5.30 ± 0.20    |             | 0.86 ± 0.17        | 11.23 ± 5.70  | Traces             |             |
|                              | Limettin                    |                |             |                    |               |                    |             |
|                              | <b>Furanocoumarins</b>      |                |             |                    |               |                    |             |
|                              | Psoralen                    |                |             |                    |               |                    |             |
| Bergapten cluster            | Bergaptol                   | 3.86 ± 0.60    |             | 0.68 ± 0.05        | 23.00 ± 11.51 | 0.80 ± 0.08        | 0.50 ± 0.14 |
|                              | Bergapten                   | 0.61 ± 0.15    |             | 0.13 ± 0.01        | 2.18 ± 1.33   |                    | 0.79 ± 0.18 |
|                              | Isoimperatorin              |                |             | Traces             |               |                    | 0.33 ± 0.04 |
|                              | Oxypeucedanin               |                |             |                    |               |                    | 0.73 ± 0.31 |
|                              | Oxypeucedanin hydrate       |                |             |                    |               |                    | 0.16 ± 0.04 |
|                              | Bergamottin                 |                |             | 0.98 ± 0.52        | Traces        |                    | 0.14 ± 0.03 |
| Xanthotoxin cluster          | Epoxybergamottin            |                |             |                    |               |                    |             |
|                              | 6', 7'-dihydroxybergamottin |                |             |                    |               |                    |             |
|                              | Xanthotoxol                 |                |             |                    |               |                    |             |
|                              | Xanthotoxin                 |                |             |                    |               |                    |             |
|                              | Imperatorin                 |                |             |                    |               |                    |             |
|                              | Heraclenin                  |                |             |                    |               |                    |             |
| Isopimpinellin cluster       | Heraclenol                  |                |             |                    |               |                    |             |
|                              | 8-geranyloxypsoralen        |                |             |                    |               |                    |             |
|                              | Isopimpinellin              | 1.52 ± 0.22    | 0.51 ± 0.03 | 5.73 ± 3.15        | 0.66 ± 0.11   | 0.23 ± 0.08        | 0.11 ± 0.01 |
|                              | Phellopterin                |                |             |                    |               |                    |             |
|                              | Byakangelicol               |                |             |                    |               |                    |             |
|                              | Byakangelicin               |                |             |                    |               |                    |             |
| TOTAL (mg.kg <sup>-1</sup> ) |                             | 11.29          | 2.18        | 43.85              | 1.64          | 2.96               | 0.58        |

**Tables D. Concentration (in mg.kg-1 fresh weight ± standard deviation) of the coumarins and the furanocoumarins in the sweet and acidic mandarins peel and pulp extracts.** The mention « Traces » is used for compounds that could be detected but not quantitated (3 < S/N < 10) while « Detected » is used when 5-geranyloxy-7-methoxycoumarin was identified in the samples.

|                                |                            | Duncan grapefruit |               | Marsh grapefruit |              | Star Ruby grapefruit |              |
|--------------------------------|----------------------------|-------------------|---------------|------------------|--------------|----------------------|--------------|
|                                |                            | Peel              | Pulp          | Peel             | Pulp         | Peel                 | Pulp         |
| <b>Coumarins</b>               |                            |                   |               |                  |              |                      |              |
| Umbelliferone                  |                            | 2.79 ± 0.50       |               | 3.38 ± 0.85      |              | 2.90 ± 1.16          |              |
| Osthol                         |                            | 3.24 ± 0.47       | Traces        | 3.94 ± 1.25      | 0.09 ± 0.02  | 5.13 ± 2.03          | 0.12 ± 0.04  |
| Auraptén                       |                            | 10.89 ± 6.37      | 2.28 ± 0.31   | 36.34 ± 15.93    | 1.66 ± 0.77  | 38.51 ± 25.07        | 3.80 ± 1.54  |
| Epoxyauraptén                  |                            | 4.69 ± 0.82       | 2.95 ± 0.39   | 35.96 ± 9.53     | Traces       | 32.58 ± 6.71         | Traces       |
| Limettin                       |                            | 1.23 ± 0.07       |               | 1.08 ± 0.30      | Traces       | 1.71 ± 0.68          | 0.32 ± 0.09  |
| 5-geranyloxy-7-methoxycoumarin |                            | Detected          |               | Detected         |              | Detected             |              |
| <b>Furanocoumarins</b>         |                            |                   |               |                  |              |                      |              |
| Psoralén                       |                            |                   | 0.36 ± 0.04   |                  | 0.20 ± 0.11  |                      | 0.27 ± 0.12  |
| Bergapten cluster              | Bergaptol                  | 17.73 ± 3.93      | 8.26 ± 2.27   |                  | 3.91 ± 1.19  |                      | 3.74 ± 0.99  |
|                                | Bergapten                  | 3.10 ± 0.65       | Traces        | 1.13 ± 0.41      | Traces       | 1.54 ± 0.66          | 1.19 ± 0.22  |
|                                | Isoimperatorin             | Traces            | Traces        | Traces           | Traces       |                      | Traces       |
|                                | Oxypeucedanin              | 0.71 ± 0.08       | 0.44 ± 0.04   | 0.76 ± 0.33      | 0.29 ± 0.10  | 0.62 ± 0.24          | 0.35 ± 0.04  |
|                                | Oxypeucedanin hydrate      |                   |               |                  |              |                      |              |
|                                | Bergamottin                | 1.87 ± 1.11       | 26.53 ± 5.40  | 6.55 ± 1.99      | 10.46 ± 2.62 | 12.67 ± 4.03         | 13.70 ± 4.81 |
|                                | Epoxybergamottin           | 4.94 ± 1.16       | Traces        | 25.57 ± 9.09     | 4.46 ± 1.66  | 51.55 ± 21.46        | 3.43 ± 1.22  |
| Xanthoxin cluster              | 6',7'-dihydroxybergamottin | 245.64 ± 51.95    | 175.13 ± 5.50 | 55.94 ± 15.80    | 34.21 ± 6.44 | 68.97 ± 26.28        | 20.82 ± 7.90 |
|                                | Xanthotoxol                |                   |               |                  |              |                      |              |
|                                | Xanthotoxin                |                   |               |                  |              |                      |              |
|                                | Imperatorin                |                   |               |                  |              |                      |              |
|                                | Heraclénin                 |                   |               |                  |              |                      |              |
|                                | Heraclénol                 |                   |               |                  |              |                      |              |
| Isopimpinellin cluster         | 8-geranyloxypsoralén       |                   | Traces        |                  |              |                      |              |
|                                | Isopimpinellin             | 0.47 ± 0.05       | Traces        | 0.38 ± 0.08      | Traces       | 0.95 ± 0.21          | 0.14 ± 0.04  |
|                                | Phellopterin               |                   |               |                  |              |                      |              |
|                                | Byakangelicol              |                   |               |                  |              |                      |              |
|                                | Byakangelicin              |                   |               |                  |              |                      |              |
|                                | Cnidilin                   |                   |               |                  | Traces       |                      |              |
| TOTAL (mg.kg <sup>-1</sup> )   |                            | 297.30            | 215.95        | 171.03           | 55.28        | 217.13               | 47.88        |

**Table E. Concentration (in mg.kg<sup>-1</sup> fresh weight ± standard deviation) of the coumarins and the furanocoumarins in the grapefruits peel and pulp extracts.** The mention « Traces » is used for compounds that could be detected but not quantitated (3 < S/N < 10) while « Detected » is used when 5-geranyloxy-7-methoxycoumarin was identified in the samples.

|                              |                                | Washington Navel<br>sweet orange |             | Shamouti<br>sweet orange |             | Hamlin<br>sweet orange |             | Pineapple<br>sweet orange |             |
|------------------------------|--------------------------------|----------------------------------|-------------|--------------------------|-------------|------------------------|-------------|---------------------------|-------------|
|                              |                                | Peel                             | Pulp        | Peel                     | Pulp        | Peel                   | Pulp        | Peel                      | Pulp        |
| Bergapten cluster            | <b>Coumarins</b>               |                                  |             |                          |             |                        |             |                           |             |
|                              | Umbelliferone                  |                                  |             |                          |             |                        |             |                           |             |
|                              | Osthol                         | Traces                           | 0.17 ± 0.01 | 0.14 ± 0.02              | Traces      | 0.22 ± 0.04            | 0.20 ± 0.03 |                           |             |
|                              | Auraptén                       |                                  |             |                          |             |                        |             |                           |             |
|                              | Epoxyauraptén                  |                                  |             |                          |             |                        |             |                           |             |
|                              | Limettin                       | 0.92 ± 0.13                      | Traces      |                          |             |                        |             | 6.15 ± 0.71               | 1.18 ± 0.18 |
|                              | 5-geranyloxy-7-methoxycoumarin |                                  |             |                          |             |                        |             |                           |             |
|                              | <b>Furanocoumarins</b>         |                                  |             |                          |             |                        |             |                           |             |
|                              | Psoralén                       |                                  |             |                          |             |                        |             |                           |             |
|                              | Bergaptol                      | Traces                           |             |                          |             |                        |             | 4.26 ± 0.40               |             |
| Xanthotoxin cluster          | Bergapten                      |                                  |             |                          |             |                        |             |                           |             |
|                              | Isoimperatorin                 | 0.73 ± 0.16                      | 0.63 ± 0.10 | 0.41 ± 0.07              | 0.33 ± 0.01 | 0.53 ± 0.08            | 0.26 ± 0.03 | Traces                    | Traces      |
|                              | Oxypeucedanin                  |                                  |             |                          |             |                        |             |                           |             |
|                              | Oxypeucedanin hydrate          |                                  |             |                          |             |                        |             |                           |             |
|                              | Bergamottin                    |                                  |             |                          |             |                        |             |                           |             |
|                              | Epoxybergamottin               |                                  |             |                          |             |                        |             |                           |             |
| Isopimpinellin cluster       | 6',7'-dihydroxybergamottin     |                                  |             |                          |             |                        |             |                           |             |
|                              | Xanthotoxol                    |                                  |             |                          |             |                        |             |                           |             |
|                              | Xanthotoxin                    |                                  |             |                          |             |                        |             |                           |             |
|                              | Imperatorin                    |                                  |             |                          |             |                        |             |                           |             |
|                              | Heraclénin                     |                                  |             |                          |             |                        |             |                           |             |
| TOTAL (mg.kg <sup>-1</sup> ) | Heraclénol                     |                                  |             |                          |             |                        |             |                           |             |
|                              | 8-geranyloxypsoralén           |                                  |             |                          |             |                        |             |                           |             |
|                              | Isopimpinellin                 |                                  |             |                          |             |                        |             | 2.29 ± 0.56               | 0.58 ± 0.08 |
|                              | Phellopterin                   |                                  |             |                          |             |                        |             |                           |             |
|                              | Byakangelicol                  |                                  |             |                          |             |                        |             |                           |             |
|                              | Byakangelicin                  |                                  |             |                          |             |                        |             |                           |             |
|                              | Cnidilin                       |                                  |             |                          |             |                        |             |                           |             |
|                              | Cnidicin                       |                                  |             |                          |             |                        |             |                           |             |
| TOTAL (mg.kg <sup>-1</sup> ) |                                | 1.65                             | 0.80        | 0.55                     | 0.33        | 0.75                   | 0.46        | 12.70                     | 1.76        |

**Table F. Concentration (in mg.kg<sup>-1</sup> fresh weight ± standard deviation) of the coumarins and the furanocoumarins in the sweet oranges peel and pulp extracts.** The mention « Traces » is used for compounds that could be detected but not quantitated (3 < S/N < 10) while « Detected » is used when 5-geranyloxy-7-methoxycoumarin was identified in the samples.

|                              |                               | Maroc sour Orange |               | Bouquetier de Nice<br>sour orange |                | Granito sour orange |               | Chinotto sour orange |               |
|------------------------------|-------------------------------|-------------------|---------------|-----------------------------------|----------------|---------------------|---------------|----------------------|---------------|
|                              |                               | Peel              | Pulp          | Peel                              | Pulp           | Peel                | Pulp          | Peel                 | Pulp          |
|                              | <b>Coumarins</b>              |                   |               |                                   |                |                     |               |                      |               |
|                              | Umbelliferone                 | 14.89 ± 2.83      | 0.79 ± 0.18   | 21.22 ± 4.97                      | 1.77 ± 0.32    | 19.96 ± 2.93        | 0.96 ± 0.36   | 11.29 ± 3.84         | 1.91 ± 0.51   |
|                              | Osthol                        |                   |               |                                   |                |                     |               |                      |               |
|                              | Auraptén                      |                   | 2.89 ± 0.56   |                                   | 9.97 ± 4.07    |                     |               |                      | 3.17 ± 0.48   |
|                              | Epoxyauraptén                 |                   |               |                                   |                |                     |               |                      |               |
|                              | <b>Furanocoumarins</b>        |                   |               |                                   |                |                     |               |                      |               |
|                              | Psoralén                      | Detected          | Detected      | Detected                          | Detected       | Detected            | Detected      | Detected             | Detected      |
|                              |                               |                   | Traces        |                                   | 0.35 ± 0.12    |                     | 0.16 ± 0.02   |                      | Traces        |
|                              | Bergaptol                     |                   | 4.77 ± 1.42   |                                   | 6.72 ± 1.76    |                     | 5.67 ± 2.22   |                      |               |
|                              | Bergaptén                     | 17.87 ± 5.77      | 39.81 ± 14.23 | 21.75 ± 5.28                      | 107.76 ± 46.02 | 41.92 ± 2.29        | 79.08 ± 34.97 | 15.43 ± 6.90         | 75.48 ± 20.37 |
|                              | Isoimperatorin                | 2.79 ± 0.38       |               | 3.85 ± 0.72                       | Traces         | 7.65 ± 0.66         | Traces        | 2.61 ± 0.69          | Traces        |
|                              | Oxypeucedanin                 | 0.46 ± 0.12       | 0.28 ± 0.07   | 0.50 ± 0.02                       | 0.28 ± 0.02    | 0.68 ± 0.04         | 0.70 ± 0.05   | 0.45 ± 0.06          | 0.22 ± 0.01   |
|                              | Oxypeucedanin hydrate         |                   |               |                                   |                |                     |               |                      |               |
|                              | Bergamottin                   | 0.35 ± 0.11       | 1.68 ± 0.42   | 0.69 ± 0.12                       | 2.08 ± 0.68    | 1.08 ± 0.23         | 2.98 ± 0.45   | 0.59 ± 0.25          | 0.18 ± 0.11   |
|                              | Epoxbergamottin               | 22.05 ± 5.43      | 7.57 ± 1.19   | 27.82 ± 8.59                      | 7.32 ± 2.80    | 48.09 ± 7.84        | 11.40 ± 2.20  | 13.29 ± 2.23         |               |
|                              | 6',7'-dihydroxybergamottin    | 19.56 ± 3.76      | 11.26 ± 4.47  | 34.71 ± 9.09                      | 23.29 ± 11.26  | 45.90 ± 4.72        | 20.96 ± 2.37  | 38.43 ± 15.78        | 10.68 ± 2.86  |
|                              | <b>Xanthotoxin cluster</b>    |                   |               |                                   |                |                     |               |                      |               |
|                              | Xanthotoxin                   |                   | Traces        |                                   | Traces         |                     |               |                      | Traces        |
|                              | Imperatorin                   |                   |               |                                   |                |                     |               |                      |               |
|                              | Heraclénin                    |                   |               |                                   |                |                     |               |                      |               |
|                              | 8-geranyloxypsoralén          |                   |               |                                   |                |                     |               |                      |               |
|                              | <b>Isopimpinellin cluster</b> |                   |               |                                   |                |                     |               |                      |               |
|                              | Isopimpinellin                | Traces            | Traces        | Traces                            | Traces         | Traces              | Traces        | Traces               | Traces        |
|                              | Phellopterin                  |                   |               |                                   |                |                     |               |                      |               |
|                              | Byakangelicol                 |                   |               |                                   |                |                     |               |                      |               |
|                              | Byakangelicin                 |                   |               |                                   |                |                     |               |                      |               |
|                              | Cnidilin                      |                   |               |                                   |                |                     |               |                      |               |
|                              | Cnidicin                      |                   |               |                                   |                |                     |               |                      |               |
| TOTAL (mg.kg <sup>-1</sup> ) |                               | 77.97             | 69.05         | 110.54                            | 159.54         | 165.28              | 121.91        | 82.09                | 91.64         |

**Table G. Concentration (in mg.kg-1 fresh weight ± standard deviation) of the coumarins and the furanocoumarins in the sour oranges peel and pulp extracts.** The mention « Traces » is used for compounds that could be detected but not quantitated (3 < S/N < 10) while « Detected » is used when 5-geranyloxy-7-methoxycoumarin was identified in the samples.

|                                |                       | Commune clementine |             | Murcott tangor |             | Bendiguangju |             | Fortune mandarin |             |
|--------------------------------|-----------------------|--------------------|-------------|----------------|-------------|--------------|-------------|------------------|-------------|
|                                |                       | Peel               | Pulp        | Peel           | Pulp        | Peel         | Pulp        | Peel             | Pulp        |
|                                | Coumarins             |                    |             |                |             |              |             |                  |             |
|                                | Umbelliferone         | 0.81 ± 0.19        |             |                |             |              |             |                  |             |
|                                | Osthol                |                    |             |                |             |              |             |                  |             |
|                                | Aurapten              | 0.15 ± 0.03        | 0.14 ± 0.03 | 0.29 ± 0.03    |             |              |             |                  |             |
|                                | Epoxyaurapten         |                    |             |                |             |              |             |                  |             |
|                                | Limettin              | 3.16 ± 0.24        | 0.42 ± 0.05 | Traces         |             |              |             | Traces           |             |
| 5-geranyloxy-7-methoxycoumarin |                       |                    |             | Detected       | Detected    | Detected     | Detected    | Detected         | Detected    |
| Furanocoumarins                |                       |                    |             |                |             |              |             |                  |             |
| Psoralen                       |                       |                    |             |                |             |              |             |                  |             |
| Bergapten cluster              | Bergaptol             |                    |             |                |             |              |             |                  |             |
|                                | Bergapten             | 3.15 ± 0.27        | 0.38 ± 0.03 |                |             |              |             |                  |             |
|                                | Isoimperatorin        |                    |             |                |             |              |             |                  |             |
|                                | Oxypeucedanin         | 0.94 ± 0.19        | 0.15 ± 0.02 | 0.60 ± 0.03    | 0.36 ± 0.09 | 0.53 ± 0.08  | 0.28 ± 0.04 | 0.62 ± 0.08      | 0.33 ± 0.06 |
|                                | Oxypeucedanin hydrate | 0.94 ± 0.27        | 0.34 ± 0.04 |                |             |              |             |                  |             |
|                                | Bergamottin           |                    |             |                |             |              |             |                  |             |
| Epoxybergamottin               |                       |                    |             |                |             |              |             |                  |             |
| 6',7'-dihydroxybergamottin     |                       |                    |             |                |             |              |             |                  |             |
| Xanthotoxin cluster            | Xanthotoxol           |                    |             |                |             |              |             |                  |             |
|                                | Xanthotoxin           |                    |             |                |             |              |             |                  |             |
|                                | Imperatorin           |                    |             |                |             |              |             |                  |             |
|                                | Heraclenin            |                    |             |                |             |              |             |                  |             |
|                                | Heraclenol            |                    |             |                |             |              |             |                  |             |
|                                | 8-geranyloxypsoralen  |                    |             |                |             |              |             |                  |             |
| Isopimpinellin cluster         | Isopimpinellin        | 1.40 ± 0.26        | 0.28 ± 0.01 | Traces         |             | Traces       |             |                  |             |
|                                | Phellopterin          |                    |             |                |             |              |             |                  |             |
|                                | Byakangelicol         |                    |             |                |             |              |             |                  |             |
|                                | Byakangelicin         |                    |             |                |             |              |             |                  |             |
|                                | Cnidilin              |                    |             |                |             |              |             |                  |             |
|                                | Cnidicin              |                    |             |                |             |              |             |                  |             |
| TOTAL (mg.kg <sup>-1</sup> )   |                       | 10.55              | 1.71        | 0.60           | 0.36        | 0.53         | 0.28        | 0.91             | 0.33        |

**Table H. Concentration (in mg.kg-1 fresh weight ± standard deviation) of the coumarins and the furanocoumarins in the small mandarin hybrids peel and pulp extracts.** The mention « Traces » is used for compounds that could be detected but not quantitated (3 < S/N < 10) while « Detected » is used when 5-geranyloxy-7-methoxycoumarin was identified in the samples.



|                        |                                | Eureka lemon  |             | Meyer lemon  |             | Rough lemon  |             | Volkamer lemon |             |
|------------------------|--------------------------------|---------------|-------------|--------------|-------------|--------------|-------------|----------------|-------------|
|                        |                                | Peel          | Pulp        | Peel         | Pulp        | Peel         | Pulp        | Peel           | Pulp        |
| Bergapten cluster      | <b>Coumarins</b>               |               |             |              |             |              |             |                |             |
|                        | Umbelliferone                  | Traces        |             |              |             |              |             |                |             |
|                        | Osthol                         | Traces        | Traces      | Traces       |             |              |             |                |             |
|                        | Aurapten                       |               |             |              |             | 0.91 ± 0.43  | 0.14 ± 0.03 | 0.70 ± 0.16    | 0.23 ± 0.07 |
|                        | Epoxyaurapten                  |               |             |              |             |              |             |                |             |
|                        | Limettin                       | 24.19 ± 5.24  |             | 36.38 ± 0.87 | Traces      | 2.51 ± 0.39  | Traces      | 4.54 ± 1.23    | 1.15 ± 0.29 |
|                        | 5-geranyloxy-7-methoxycoumarin | Detected      | Detected    | Detected     |             | Detected     | Detected    |                |             |
|                        | <b>Furanocoumarins</b>         |               |             |              |             |              |             |                |             |
|                        | Psoralen                       |               |             |              |             |              |             |                |             |
|                        | Bergaptol                      | Traces        | Traces      | Traces       |             | 2.45 ± 0.60  | 0.71 ± 0.20 | 2.35 ± 0.24    | 0.43 ± 0.13 |
| Xanthotoxin cluster    | Bergapten                      | Traces        |             | 4.97 ± 1.41  | Traces      |              |             | 1.29 ± 0.22    |             |
|                        | Isoimperatorin                 | 10.48 ± 3.60  | 0.28 ± 0.12 | 17.12 ± 5.22 | 0.38 ± 0.05 | 3.08 ± 0.15  | 0.34 ± 0.09 | 1.52 ± 0.23    | 0.24 ± 0.03 |
|                        | Oxypeucedanin                  | 21.91 ± 12.56 | Traces      | 2.97 ± 0.69  | Traces      |              |             | 1.49 ± 0.55    | 0.29 ± 0.07 |
|                        | Oxypeucedanin hydrate          | 2.22 ± 1.30   | 0.13 ± 0.10 |              |             | 0.63 ± 0.15  | 0.05 ± 0.02 |                |             |
|                        | Bergamottin                    |               |             |              |             |              |             |                |             |
|                        | Epoxobergamottin               |               |             |              |             |              |             |                |             |
|                        | 6',7'-dihydroxybergamottin     |               | Traces      |              |             |              |             |                | Traces      |
|                        | Xanthotoxol                    |               |             |              |             |              |             |                |             |
|                        | Xanthotoxin                    |               |             |              |             |              |             |                |             |
|                        | Imperatorin                    |               |             |              |             |              |             |                |             |
| Isopimpinellin cluster | Heraclenin                     | 1.57 ± 0.86   |             |              |             |              |             | 0.80 ± 0.28    | Traces      |
|                        | Heraclenol                     | Traces        |             |              |             |              |             | 4.16 ± 1.44    |             |
|                        | 8-geranyloxy-psoralen          | 6.75 ± 4.27   | Traces      |              |             |              |             |                |             |
|                        | Isopimpinellin                 | 0.82 ± 0.29   |             | 2.73 ± 0.64  | Traces      | 1.92 ± 0.38  | 0.71 ± 0.24 | 1.57 ± 0.23    | 0.63 ± 0.13 |
|                        | Phellopterin                   | 4.57 ± 2.17   |             |              |             |              |             |                |             |
|                        | Byakangelicol                  | 18.15 ± 7.39  |             | 0.92 ± 0.20  |             | 2.79 ± 0.63  |             | 0.72 ± 0.14    |             |
|                        | Byakangelicin                  | 36.64 ± 16.18 |             |              |             | 20.91 ± 5.39 |             | 14.11 ± 4.53   |             |
|                        | Cnidilin                       |               |             |              | Traces      |              |             |                |             |
|                        | Cnidicin                       | Traces        |             |              |             |              |             |                |             |
|                        | TOTAL (mg.kg <sup>-1</sup> )   | 127.30        | 0.41        | 65.09        | 0.38        | 35.20        | 1.95        | 33.25          | 2.97        |

|                        |                                | Marrakech lime |             | Rangpur lime  |             | Yellow Rangpur lime |             |
|------------------------|--------------------------------|----------------|-------------|---------------|-------------|---------------------|-------------|
|                        |                                | Peel           | Pulp        | Peel          | Pulp        | Peel                | Pulp        |
| Bergapten cluster      | <b>Coumarins</b>               |                |             |               |             |                     |             |
|                        | Umbelliferone                  |                |             |               |             |                     |             |
|                        | Osthol                         |                |             |               |             |                     |             |
|                        | Aurapten                       | 0.50 ± 0.21    |             | 17.90 ± 11.15 | 0.03 ± 0.00 | 0.92 ± 0.43         | Traces      |
|                        | Epoxyaurapten                  | 24.46 ± 7.87   |             |               |             |                     |             |
|                        | Limettin                       | 4.40 ± 1.91    |             | 47.32 ± 10.17 | 1.45 ± 0.47 | 19.44 ± 2.31        | 1.24 ± 0.16 |
|                        | 5-geranyloxy-7-methoxycoumarin |                |             |               |             |                     |             |
|                        | <b>Furanocoumarins</b>         |                |             |               |             |                     |             |
|                        | Psoralen                       | 0.24 ± 0.05    |             |               |             |                     |             |
|                        | Bergaptol                      |                |             |               |             |                     |             |
| Xanthotoxin cluster    | Bergapten                      | 1.40 ± 0.27    |             | 5.25 ± 0.73   | 0.99 ± 0.14 | 2.51 ± 0.19         | 0.89 ± 0.21 |
|                        | Isoimperatorin                 |                |             | 2.61 ± 0.65   |             | 1.22 ± 0.39         |             |
|                        | Oxypeucedanin                  | 11.38 ± 4.72   | 0.21 ± 0.04 | 25.66 ± 7.49  | 0.13 ± 0.01 | 10.14 ± 2.29        | 0.10 ± 0.01 |
|                        | Oxypeucedanin hydrate          | 1.72 ± 0.73    |             | 19.93 ± 3.20  | Traces      | 2.72 ± 0.72         |             |
|                        | Bergamottin                    |                |             |               |             |                     |             |
|                        | Epoxobergamottin               |                |             | 2.86 ± 0.33   |             | Traces              |             |
|                        | 6',7'-dihydroxybergamottin     |                |             |               |             |                     |             |
|                        | Xanthotoxol                    |                |             |               |             |                     |             |
|                        | Xanthotoxin                    |                |             |               |             |                     |             |
|                        | Imperatorin                    |                |             |               |             |                     |             |
| Isopimpinellin cluster | Heraclenin                     | 3.50 ± 1.84    |             |               |             |                     |             |
|                        | Heraclenol                     | Traces         |             |               |             |                     |             |
|                        | 8-geranyloxy-psoralen          |                |             |               |             |                     |             |
|                        | Isopimpinellin                 | 0.32 ± 0.10    |             | 4.96 ± 0.71   | 0.49 ± 0.09 | 3.77 ± 0.56         | 0.55 ± 0.05 |
|                        | Phellopterin                   | Traces         |             | Traces        | Traces      | Traces              | Traces      |
|                        | Byakangelicol                  | 9.54 ± 2.08    |             | 1.80 ± 0.42   |             | 2.82 ± 0.15         |             |
|                        | Byakangelicin                  |                |             |               |             |                     |             |
|                        | Cnidilin                       | Traces         |             | Traces        | Traces      | Traces              | Traces      |
|                        | Cnidicin                       |                |             |               |             |                     |             |
|                        | TOTAL (mg.kg <sup>-1</sup> )   | 57.46          | 0.21        | 128.29        | 3.09        | 43.54               | 2.78        |

**Tables I. Concentration (in mg.kg-1 fresh weight ± standard deviation) of the coumarins and the furanocoumarins in the lemons peel and pulp extracts.** The mention « Traces » is used for compounds that could be detected but not quantitated (3 < S/N < 10) while « Detected » is used when 5-geranyloxy-7-methoxycoumarin was identified in the samples.

|                                |                             | Mexican lime  |              | Giant Key lime |              | Coppenhad lime |              | Excelsa        |             |
|--------------------------------|-----------------------------|---------------|--------------|----------------|--------------|----------------|--------------|----------------|-------------|
|                                |                             | Peel          | Pulp         | Peel           | Pulp         | Peel           | Pulp         | Peel           | Pulp        |
|                                | <b>Coumarins</b>            |               |              |                |              |                |              |                |             |
|                                | Umbelliferone               | 3.04 ± 1.15   | Traces       | 1.38 ± 0.51    | Traces       | 0.85 ± 0.12    | 0.49 ± 0.18  |                | 0.24 ± 0.02 |
|                                | Osthol                      |               |              | 0.21 ± 0.07    | Traces       | 0.15 ± 0.04    | Traces       |                |             |
|                                | Aurapten                    | Traces        | 0.33 ± 0.21  | Traces         | 0.17 ± 0.07  | Traces         | 0.22 ± 0.15  | 0.61 ± 0.18    | 0.09 ± 0.02 |
|                                | Epoxyaurapten               | Traces        |              |                |              |                |              | Traces         |             |
|                                | Limettin                    | 47.74 ± 12.59 | 1.42 ± 0.22  | 15.21 ± 5.77   | Traces       | 14.59 ± 6.67   | Traces       | 8.06 ± 0.89    | 1.10 ± 0.10 |
| 5-geranyloxy-7-methoxycoumarin |                             | Detected      | Detected     | Detected       | Detected     | Detected       | Detected     | Detected       | Detected    |
| <b>Furanocoumarins</b>         |                             |               |              |                |              |                |              |                |             |
| Psoralen                       |                             |               |              |                |              |                |              |                |             |
| Bergapten cluster              | Bergaptol                   |               |              |                | 2.17 ± 0.26  |                | 0.67 ± 0.27  | 3.12 ± 1.30    | Traces      |
|                                | Bergapten                   | 6.08 ± 3.11   | 0.63 ± 0.08  | 0.70 ± 0.32    | 0.30 ± 0.08  | 0.40 ± 0.02    | 0.15 ± 0.06  | 4.92 ± 1.00    | 0.72 ± 0.15 |
|                                | Isoimperatorin              | 16.35 ± 3.09  | 1.11 ± 0.47  | 1.66 ± 0.72    | 0.92 ± 0.41  | Traces         |              | 12.90 ± 4.98   | Traces      |
|                                | Oxypeucedanin               | 56.89 ± 7.00  | 0.42 ± 0.11  | 21.71 ± 5.69   | 0.44 ± 0.07  | 16.59 ± 6.56   | 0.26 ± 0.05  | 81.05 ± 23.24  | 0.17 ± 0.03 |
|                                | Oxypeucedanin hydrate       | 24.77 ± 9.92  | 11.95 ± 5.41 | 4.08 ± 2.12    | 2.43 ± 1.71  | 1.86 ± 0.27    | Traces       | 34.81 ± 12.83  | 0.45 ± 0.20 |
|                                | Bergamottin                 | 16.05 ± 4.69  | 15.06 ± 7.70 | 44.62 ± 9.57   | 12.99 ± 4.58 | 23.97 ± 2.82   | 1.58 ± 1.14  | 29.04 ± 10.98  | 0.13 ± 0.06 |
|                                | Epoxybergamottin            | Traces        | Traces       |                |              |                |              | 117.29 ± 33.15 |             |
|                                | 6', 7'-dihydroxybergamottin |               | Traces       |                |              |                |              | 37.10 ± 15.27  | Traces      |
| Xanthotoxin cluster            | Xanthotoxol                 |               | 6.35 ± 1.05  |                | 1.42 ± 0.21  |                | Traces       |                |             |
|                                | Xanthotoxin                 | 4.84 ± 3.11   | 0.72 ± 0.43  |                | 0.31 ± 0.12  |                |              | 0.20 ± 0.02    |             |
|                                | Imperatorin                 | 5.03 ± 2.01   | 6.64 ± 1.43  | Traces         | 2.21 ± 0.76  |                |              | 4.33 ± 0.94    |             |
|                                | Heraclenin                  | 33.96 ± 2.75  | 0.97 ± 0.36  | 6.42 ± 2.68    | 0.72 ± 0.34  | Traces         | Traces       | 2.02 ± 0.12    | Traces      |
|                                | Heraclenol                  | 7.88 ± 3.71   | 9.93 ± 4.43  |                | 2.04 ± 1.17  |                |              | Traces         |             |
| Isopimpinellin cluster         | 8-geranyloxypsoralen        | 48.08 ± 10.96 | 13.34 ± 4.74 | 24.66 ± 10.18  | 15.09 ± 6.79 | 16.10 ± 4.38   | 12.62 ± 7.50 | 11.55 ± 3.57   | Traces      |
|                                | Isopimpinellin              | 50.76 ± 8.29  | 3.29 ± 1.46  | 24.68 ± 7.60   | 1.36 ± 0.64  | 1.34 ± 0.15    | 0.18 ± 0.10  | 3.09 ± 0.23    | 0.51 ± 0.08 |
|                                | Phellopterin                | 18.85 ± 6.74  | 1.35 ± 0.21  | 2.55 ± 0.77    | 1.29 ± 0.63  | 1.15 ± 0.33    |              | Traces         | Traces      |
|                                | Byakangelicol               | 73.37 ± 7.21  | Traces       | 23.33 ± 9.00   | Traces       | 10.00 ± 1.87   | Traces       | 41.63 ± 8.43   | Traces      |
|                                | Byakangelicin               | Traces        | 14.43 ± 4.47 | Traces         | Traces       | Traces         | Traces       |                |             |
|                                | Cnidilin                    | 47.71 ± 7.84  | 2.80 ± 1.22  | 9.75 ± 3.44    | 2.09 ± 1.12  | 2.37 ± 0.97    | 0.17 ± 0.03  |                |             |
|                                | Cnidicin                    | 4.83 ± 1.74   | 1.57 ± 0.41  | 1.04 ± 0.45    | Traces       | Traces         | Traces       | 2.64 ± 0.49    |             |
| TOTAL (mg.kg <sup>-1</sup> )   |                             | 466.23        | 92.31        | 182.00         | 45.95        | 89.37          | 16.34        | 405.18         | 3.41        |

|                                |                             | Tahiti lime     |              | Bears lime     |             | Brazil sweet lime |             | Palestine sweet lime |             |
|--------------------------------|-----------------------------|-----------------|--------------|----------------|-------------|-------------------|-------------|----------------------|-------------|
|                                |                             | Peel            | Pulp         | Peel           | Pulp        | Peel              | Pulp        | Peel                 | Pulp        |
|                                | <b>Coumarins</b>            |                 |              |                |             |                   |             |                      |             |
|                                | Umbelliferone               |                 |              |                |             | Traces            |             | Traces               |             |
|                                | Osthol                      |                 |              |                |             |                   |             | Traces               | Traces      |
|                                | Aurapten                    | 1.17 ± 0.20     | 0.25 ± 0.08  | 1.20 ± 0.41    | 0.30 ± 0.05 | Traces            |             | Traces               |             |
|                                | Epoxyaurapten               |                 |              |                |             |                   |             |                      |             |
|                                | Limettin                    | 359.33 ± 147.68 | Traces       | 140.60 ± 45.93 | Traces      | 25.35 ± 10.13     | Traces      | 29.18 ± 4.70         | Traces      |
| 5-geranyloxy-7-methoxycoumarin |                             | Detected        | Detected     | Detected       | Detected    | Detected          | Detected    |                      | Detected    |
| <b>Furanocoumarins</b>         |                             |                 |              |                |             |                   |             |                      |             |
| Psoralen                       |                             | 0.33 ± 0.13     |              | Traces         |             |                   |             |                      |             |
| Bergapten cluster              | Bergaptol                   |                 |              |                |             |                   |             |                      |             |
|                                | Bergapten                   | 288.49 ± 30.74  | 1.71 ± 0.49  | 173.22 ± 54.20 | 1.80 ± 1.28 | 1.26 ± 0.22       |             | Traces               |             |
|                                | Isoimperatorin              | 1.63 ± 0.33     | Traces       | 3.17 ± 0.69    | Traces      | Traces            |             | Traces               |             |
|                                | Oxypeucedanin               | 55.23 ± 11.68   | 1.09 ± 0.42  | 67.48 ± 10.88  | 1.00 ± 0.43 | 18.77 ± 6.47      | 0.25 ± 0.02 | 13.96 ± 4.72         | 0.32 ± 0.05 |
|                                | Oxypeucedanin hydrate       | 11.69 ± 4.20    | 1.15 ± 0.45  | 11.86 ± 3.54   | 1.08 ± 0.45 | 3.10 ± 0.37       |             | 2.74 ± 0.83          |             |
|                                | Bergamottin                 | 44.27 ± 14.75   | 19.76 ± 7.58 | 29.83 ± 21.82  | 9.75 ± 5.83 | Traces            | Traces      |                      |             |
|                                | Epoxybergamottin            |                 |              |                |             |                   |             |                      |             |
|                                | 6', 7'-dihydroxybergamottin |                 |              |                |             |                   |             |                      |             |
| Xanthotoxin cluster            | Xanthotoxol                 |                 |              |                |             |                   |             |                      |             |
|                                | Xanthotoxin                 | 4.61 ± 1.57     |              | 4.07 ± 0.46    |             |                   |             |                      |             |
|                                | Imperatorin                 |                 |              |                |             |                   |             |                      |             |
|                                | Heraclenin                  | 5.64 ± 1.21     |              | 7.72 ± 0.50    |             | 1.77 ± 0.77       |             | 1.63 ± 0.73          |             |
|                                | Heraclenol                  |                 |              |                |             | Traces            |             |                      |             |
| Isopimpinellin cluster         | 8-geranyloxypsoralen        | 21.58 ± 4.21    | 16.41 ± 7.77 | 23.97 ± 2.60   | 8.10 ± 4.02 |                   |             |                      |             |
|                                | Isopimpinellin              | 87.20 ± 11.92   | 2.92 ± 1.21  | 57.16 ± 10.03  | 2.92 ± 1.35 | 1.22 ± 0.09       | Traces      | 1.28 ± 0.17          | Traces      |
|                                | Phellopterin                | 2.83 ± 0.66     | Traces       | 3.28 ± 0.16    | 1.74 ± 0.97 |                   |             | Traces               |             |
|                                | Byakangelicol               | 17.25 ± 3.76    |              | 13.80 ± 2.56   |             | 6.67 ± 1.70       |             | 7.26 ± 1.56          |             |
|                                | Byakangelicin               |                 |              |                |             |                   |             |                      |             |
|                                | Cnidilin                    | 1.91 ± 0.28     | 0.80 ± 0.22  | 3.51 ± 0.37    | Traces      |                   |             |                      |             |
|                                | Cnidicin                    |                 | Traces       |                | Traces      |                   |             |                      |             |
| TOTAL (mg.kg <sup>-1</sup> )   |                             | 903.16          | 44.09        | 540.87         | 26.69       | 58.14             | 0.25        | 56.05                | 0.32        |

|                              |                                | Alemow        |              |
|------------------------------|--------------------------------|---------------|--------------|
|                              |                                | Peel          | Pulp         |
|                              | <b>Coumarins</b>               |               |              |
|                              | Umbelliferone                  | 1.35 ± 0.37   | 0.51 ± 0.25  |
|                              | Osthol                         |               |              |
|                              | Aurapten                       | 51.64 ± 28.60 | 14.47 ± 4.12 |
|                              | Epoxyaurapten                  | 48.84 ± 11.80 | Traces       |
|                              | Limettin                       | 84.71 ± 25.73 | 1.94 ± 0.23  |
|                              | 5-geranyloxy-7-methoxycoumarin | Detected      | Detected     |
|                              | <b>Furanocoumarins</b>         |               |              |
|                              | Psoralen                       |               |              |
| Bergapten cluster            | Bergaptol                      |               |              |
|                              | Bergapten                      | 10.07 ± 2.43  | 1.04 ± 0.15  |
|                              | Isoimperatorin                 | 36.78 ± 6.87  | Traces       |
|                              | Oxypeucedanin                  | 81.44 ± 17.26 |              |
|                              | Oxypeucedanin hydrate          | 49.72 ± 13.98 | 0.50 ± 0.02  |
|                              | Bergamottin                    | 4.73 ± 2.70   | Traces       |
|                              | Epoxybergamottin               | 10.67 ± 1.52  |              |
|                              | 6', 7'-dihydroxybergamottin    | 38.17 ± 6.42  | Traces       |
| Xanthotoxin cluster          | Xanthotoxol                    |               | 1.00 ± 0.34  |
|                              | Xanthotoxin                    |               |              |
|                              | Imperatorin                    | 23.92 ± 6.40  | 2.49 ± 0.95  |
|                              | Heraclenin                     | 61.43 ± 8.20  | 1.02 ± 0.44  |
|                              | Heraclenol                     | 32.96 ± 5.69  | 1.73 ± 0.62  |
|                              | 8-geranyloxypsoralen           | 15.18 ± 6.84  | 3.18 ± 0.82  |
| Isopimpinellin cluster       | Isopimpinellin                 | 4.85 ± 0.45   | 0.70 ± 0.12  |
|                              | Phellopterin                   | 40.98 ± 5.30  | 4.50 ± 1.31  |
|                              | Byakangelicol                  | 72.00 ± 12.56 | 1.79 ± 0.72  |
|                              | Byakangelicin                  | 33.13 ± 8.43  | 13.46 ± 3.68 |
|                              | Cnidilin                       | 13.89 ± 1.10  |              |
|                              | Cnidicin                       | 7.14 ± 1.05   | Traces       |
| TOTAL (mg.kg <sup>-1</sup> ) |                                | 723.60        | 48.33        |

**Tables J. Concentration (in mg.kg-1 fresh weight ± standard deviation) of the coumarins and the furanocoumarins in the limes peel and pulp extracts.** The mention « Traces » is used for compounds that could be detected but not quantitated (3 < S/N < 10) while « Detected » is used when 5-geranyloxy-7-methoxycoumarin was identified in the samples.

|                              |                                | Castagnaro bergamot |               |
|------------------------------|--------------------------------|---------------------|---------------|
|                              |                                | Peel                | Pulp          |
|                              | <b>Coumarins</b>               |                     |               |
|                              | Umbelliferone                  |                     |               |
|                              | Osthol                         | 0.39 ± 0.10         | 0.10 ± 0.02   |
|                              | Aurapten                       | 0.20 ± 0.09         | 0.19 ± 0.09   |
|                              | Epoxyaurapten                  | 10.72 ± 1.81        |               |
|                              | Limettin                       | 25.69 ± 3.66        | 1.30 ± 0.46   |
|                              | 5-geranyloxy-7-methoxycoumarin | Detected            | Detected      |
|                              | <b>Furanocoumarins</b>         |                     |               |
|                              | Psoralen                       | 0.47 ± 0.13         | 0.57 ± 0.49   |
| Bergapten cluster            | Bergaptol                      |                     | 8.57 ± 1.02   |
|                              | Bergapten                      | 388.21 ± 105.05     | 51.56 ± 43.53 |
|                              | Isoimperatorin                 | Traces              | 0.88 ± 0.17   |
|                              | Oxypeucedanin                  | 0.80 ± 0.52         | 0.25 ± 0.01   |
|                              | Oxypeucedanin hydrate          |                     |               |
|                              | Bergamottin                    | 54.70 ± 38.91       | 49.67 ± 31.26 |
| Xanthotoxin cluster          | Epoxybergamottin               |                     |               |
|                              | 6',7'-dihydroxybergamottin     |                     |               |
|                              | Xanthotoxol                    |                     |               |
|                              | Xanthotoxin                    |                     |               |
|                              | Imperatorin                    |                     |               |
|                              | Heraclenin                     |                     | Traces        |
| Isopimpinellin cluster       | Heraclenol                     |                     | Traces        |
|                              | 8-geranyloxypsoralen           |                     |               |
|                              | Isopimpinellin                 | 2.57 ± 0.27         | 0.30 ± 0.15   |
|                              | Phellopterin                   |                     |               |
|                              | Byakangelicol                  |                     |               |
|                              | Byakangelicin                  |                     |               |
|                              | Cnidilin                       |                     |               |
|                              | Cnidicin                       |                     |               |
| TOTAL (mg.kg <sup>-1</sup> ) |                                | 483.75              | 113.39        |

**Table K. Concentration (in mg.kg<sup>-1</sup> fresh weight ± standard deviation) of the coumarins and the furanocoumarins in the bergamot peel and pulp extracts.** The mention « Traces » is used for compounds that could be detected but not quantitated (3 < S/N < 10) while « Detected » is used when 5-geranyloxy-7-methoxycoumarin was identified in the samples.

|                              |                                | Mountain    |             | Yuzu          |             | Khasi        |             | Nasnaran       |              |
|------------------------------|--------------------------------|-------------|-------------|---------------|-------------|--------------|-------------|----------------|--------------|
|                              |                                | Peel        | Pulp        | Peel          | Pulp        | Peel         | Pulp        | Peel           | Pulp         |
|                              | <b>Coumarins</b>               |             |             |               |             |              |             |                |              |
|                              | Umbelliferone                  |             |             |               |             | Traces       |             | 1.76 ± 0.40    |              |
|                              | Osthol                         |             |             | 1.88 ± 0.44   |             |              |             |                |              |
|                              | Aurapten                       | 0.36 ± 0.06 | 0.22 ± 0.05 | 20.64 ± 11.65 | 3.60 ± 1.21 | 0.14 ± 0.03  | 0.05 ± 0.02 | 1.39 ± 0.34    | 0.13 ± 0.04  |
|                              | Epoxyaurapten                  |             |             | 17.54 ± 2.43  |             |              |             |                |              |
|                              | Limettin                       | 4.17 ± 1.06 | 0.93 ± 0.37 | 4.59 ± 1.08   |             | 5.04 ± 0.25  | 0.58 ± 0.10 | 12.58 ± 3.13   | 1.30 ± 0.26  |
|                              | 5-geranyloxy-7-methoxycoumarin | Detected    |             | Detected      | Detected    | Detected     | Detected    | Detected       | Detected     |
|                              | <b>Furanocoumarins</b>         |             |             |               |             |              |             |                |              |
|                              | Psoralen                       |             |             |               |             |              |             |                |              |
| Bergapten cluster            | Bergaptol                      |             |             |               |             |              | Traces      | 17.66 ± 7.38   | 6.62 ± 2.07  |
|                              | Bergapten                      | 3.72 ± 0.95 | 0.70 ± 0.20 | 21.91 ± 2.42  | Traces      | 3.53 ± 0.11  | 0.44 ± 0.06 | 44.11 ± 10.19  | 1.56 ± 0.48  |
|                              | Isoimperatorin                 | Traces      | Traces      |               |             | Traces       |             | 40.54 ± 8.66   | 2.92 ± 1.01  |
|                              | Oxypeucedanin                  | 2.37 ± 0.34 | 0.08 ± 0.01 | 0.39 ± 0.22   | 0.30 ± 0.08 | 1.34 ± 0.20  | 0.13 ± 0.01 | 278.71 ± 74.61 | 6.94 ± 2.40  |
|                              | Oxypeucedanin hydrate          | 0.32 ± 0.08 | 0.20 ± 0.04 |               |             | Traces       |             | 135.44 ± 36.17 | 14.51 ± 3.34 |
|                              | Bergamottin                    | Traces      |             | 0.69 ± 0.10   | Traces      | Traces       |             | 55.94 ± 21.99  | 10.26 ± 3.71 |
| Xanthotoxin cluster          | Epoxybergamottin               |             |             |               |             |              |             | 61.01 ± 15.30  | 4.96 ± 1.68  |
|                              | 6',7'-dihydroxybergamottin     |             |             |               |             |              | Traces      | 101.36 ± 16.35 | 12.82 ± 5.90 |
|                              | Xanthotoxol                    |             |             |               |             |              | Traces      |                |              |
|                              | Xanthotoxin                    |             |             |               |             | 1.39 ± 0.67  | 0.21 ± 0.11 | Traces         |              |
|                              | Imperatorin                    |             |             |               |             |              |             |                |              |
|                              | Heraclenin                     |             |             |               |             | 6.13 ± 1.60  | Traces      |                |              |
| Isopimpinellin cluster       | Heraclenol                     |             |             |               |             | Traces       | Traces      |                |              |
|                              | 8-geranyloxypsoralen           |             |             |               |             | 15.62 ± 1.75 | 1.84 ± 0.76 |                | 2.26 ± 0.75  |
|                              | Isopimpinellin                 | 2.33 ± 0.39 | 0.61 ± 0.21 | 2.61 ± 0.67   | 0.46 ± 0.19 | 13.14 ± 3.02 | 0.39 ± 0.03 | 6.70 ± 1.28    | 0.88 ± 0.12  |
|                              | Phellopterin                   |             |             |               |             |              |             |                |              |
|                              | Byakangelicol                  |             |             |               |             | 4.05 ± 0.74  |             | Traces         |              |
|                              | Byakangelicin                  |             |             |               |             |              |             |                |              |
| TOTAL (mg.kg <sup>-1</sup> ) |                                | 13.27       | 2.74        | 70.25         | 4.36        | 50.38        | 3.64        | 757.20         | 65.16        |

|                              |                                | Mandarin x citron hybrid |             |
|------------------------------|--------------------------------|--------------------------|-------------|
|                              |                                | Peel                     | Pulp        |
|                              | <b>Coumarins</b>               |                          |             |
|                              | Umbelliferone                  |                          |             |
|                              | Osthol                         |                          |             |
|                              | Aurapten                       | 0.80 ± 0.22              | 0.08 ± 0.02 |
|                              | Epoxyaurapten                  |                          |             |
|                              | Limettin                       | 2.79 ± 0.08              | 0.48 ± 0.04 |
|                              | 5-geranyloxy-7-methoxycoumarin | Detected                 | Detected    |
|                              | <b>Furanocoumarins</b>         |                          |             |
|                              | Psoralen                       |                          |             |
| Bergapten cluster            | Bergaptol                      |                          |             |
|                              | Bergapten                      | 2.38 ± 0.26              | 0.46 ± 0.07 |
|                              | Isoimperatorin                 | 1.00 ± 0.13              |             |
|                              | Oxypeucedanin                  | 2.14 ± 0.44              | 0.12 ± 0.01 |
|                              | Oxypeucedanin hydrate          |                          |             |
|                              | Bergamottin                    | Traces                   |             |
| Xanthotoxin cluster          | Epoxybergamottin               | Traces                   |             |
|                              | 6',7'-dihydroxybergamottin     |                          |             |
|                              | Xanthotoxol                    |                          |             |
|                              | Xanthotoxin                    |                          |             |
|                              | Imperatorin                    |                          |             |
|                              | Heraclenin                     |                          |             |
| Isopimpinellin cluster       | Heraclenol                     |                          |             |
|                              | 8-geranyloxypsoralen           |                          |             |
|                              | Isopimpinellin                 | 1.45 ± 0.20              | 0.36 ± 0.06 |
|                              | Phellopterin                   |                          |             |
|                              | Byakangelicol                  | 1.00 ± 0.35              |             |
|                              | Byakangelicin                  | Traces                   |             |
| TOTAL (mg.kg <sup>-1</sup> ) |                                | 11.56                    | 1.50        |

**Tables L. Concentration (in mg.kg-1 fresh weight ± standard deviation) of the coumarins and the furanocoumarins in the unknown origin hybrids peel and pulp extracts.** The mention « Traces » is used for compounds that could be detected but not quantitated (3 < S/N < 10) while « Detected » is used when 5-geranyloxy-7-methoxycoumarin was identified in the samples.
