# Supplementary material
Source: publisher figshare collection journal article supplement (https://plos.figshare.com/articles/dataset/_/1600585)
Supplement: Supplementary file [file 1]

| Horticultural group      | Common name of ancestral species | SRA number | Swingle's classification system              | Tanaka's classification system           | Phylogenetic constitution                                                                                                                        | References      |
|--------------------------|----------------------------------|------------|----------------------------------------------|------------------------------------------|--------------------------------------------------------------------------------------------------------------------------------------------------|-----------------|
| Papeda                   | Micrantha                        | -          | C. micrantha Wester                          | C. micrantha Wester                      | C. micrantha                                                                                                                                     | (8, 10, 12, 14) |
|                          | Combava                          | 630        | C. hystrix D.C.                              | C. hystrix D.C.                          | C. micrantha                                                                                                                                     |                 |
| Citron                   | Corsecan citron                  | 613        | C. medica L.                                 | C. medica L.                             | C. medica                                                                                                                                        |                 |
|                          | Etiog citron                     | 709        | C. medica L.                                 | C. medica L.                             | C. medica                                                                                                                                        |                 |
|                          | Buddha's Hand citron             | 640        | C. medica L.                                 | C. medica L.                             | C. medica                                                                                                                                        | (8, 10, 12, 14) |
| Pummelo                  | Deep Red pummelo                 | 757        | C. maxima (Burm.) Merr.                      | C. maxima (Burm.) Merr.                  | C. maxima                                                                                                                                        |                 |
|                          | Reinking pummelo                 | 323        | C. maxima (Burm.) Merr.                      | C. maxima (Burm.) Merr.                  | C. maxima                                                                                                                                        |                 |
|                          | Tahiti pummelo                   | 727        | C. maxima (Burm.) Merr.                      | C. maxima (Burm.) Merr.                  | C. maxima                                                                                                                                        |                 |
|                          | Chandler pummelo                 | 608        | C. maxima (Burm.) Merr.                      | C. maxima (Burm.) Merr.                  | C. maxima                                                                                                                                        |                 |
|                          | Sans pépin pummelo               | 710        | C. maxima (Burm.) Merr.                      | C. maxima (Burm.) Merr.                  | C. maxima                                                                                                                                        |                 |
|                          | Kao Pan pummelo                  | 321        | C. maxima (Burm.) Merr.                      | C. maxima (Burm.) Merr.                  | C. maxima                                                                                                                                        |                 |
|                          | Pink pummelo                     | 322        | C. maxima (Burm.) Merr.                      | C. maxima (Burm.) Merr.                  | C. maxima                                                                                                                                        |                 |
|                          | Willowleaf mandarin              | 133        | C. reticulata Blanco                         | C. deliciosa Ten.                        | C. reticulata                                                                                                                                    |                 |
| Mandarin                 | Fuzhu mandarin                   | 599        | C. reticulata Blanco                         | C. erythrosa Hort. ex Tan.               | C. reticulata                                                                                                                                    |                 |
|                          | San Hu Hong Chu mandarin         | 769        | C. reticulata Blanco                         | C. erythrosa Hort. ex Tan.               | C. reticulata                                                                                                                                    |                 |
|                          | Nan Feng Mi Ju mandarin          | 839        | C. reticulata Blanco                         | C. kinokuni Hort. ex Tan.                | C. reticulata                                                                                                                                    |                 |
|                          | Beauty mandarin                  | 261        | C. reticulata Blanco                         | C. reticulata Blanco                     | C. reticulata                                                                                                                                    |                 |
|                          | Dancy mandarin                   | 552        | C. reticulata Blanco                         | C. tangerina Hort. ex Tan.               | C. reticulata                                                                                                                                    |                 |
|                          | Wase satsuma                     | 230        | C. reticulata Blanco                         | C. unshu Marc.                           | C. reticulata                                                                                                                                    |                 |
|                          | Ovali satsuma                    | 221        | C. reticulata Blanco                         | C. unshu Marc.                           | C. reticulata                                                                                                                                    |                 |
|                          | Sunki mandarin                   | 705        | C. reticulata Blanco var. austera Swing.     | C. sunki (Hayata) Hort. ex Tan.          | C. reticulata var austera                                                                                                                        |                 |
|                          | Shekwasha mandarin               | 982        | C. reticulata Blanco hybrid                  | C. depressa Hayata                       | C. reticulata var austera                                                                                                                        |                 |
|                          | Cleopatra mandarin               | 948        | C. reticulata Blanco var. austera Swing.     | C. resini Hort. ex Tan.                  | C. reticulata var austera                                                                                                                        | (8, 10, 12, 14) |
| Horticultural group      | Common name of secondary species | SRA number | Swingle's classification system              | Tanaka's classification system           | Phylogenetic constitution                                                                                                                        |                 |
| Small mandarin hybrid    | Commune Clementine               | 92         | C. reticulata x C. sinensis                  | C. clementina Hort ex Tan.               | C. reticulata x ((C. maxima x C. reticulata) x C. reticulata)                                                                                    |                 |
|                          | Murcott tangor                   | 601        | C. reticulata x C. sinensis ?                | C. reticulata x C. sinensis ?            | C. reticulata x ((C. maxima x C. reticulata) x C. reticulata) ?                                                                                  | (49)            |
|                          | Bendiguanqu                      | 578        | C. reticulata Blanco                         | C. nobilis Lour.                         | ?                                                                                                                                                |                 |
| Sweet orange             | Fortune mandarin                 | 31         | (C. reticulata x C. sinensis) x C. tangerina | C. clementina x C. tangerina             | ((C. reticulata x ((C. maxima x C. reticulata) x C. reticulata) x C. reticulata) x ((C. maxima x C. reticulata) x C. reticulata) x C. reticulata | (49)            |
|                          | Washington Navel sweet orange    | 217        | C. sinensis (L.) Osbeck                      | C. sinensis (L.) Osbeck                  | (C. maxima x C. reticulata) x C. reticulata                                                                                                      |                 |
|                          | Shanouti sweet orange            | 299        | C. sinensis (L.) Osbeck                      | C. sinensis (L.) Osbeck                  | (C. maxima x C. reticulata) x C. reticulata                                                                                                      | (8, 12, 14, 49) |
|                          | Hamlin sweet orange              | 41         | C. sinensis (L.) Osbeck                      | C. sinensis (L.) Osbeck                  | (C. maxima x C. reticulata) x C. reticulata                                                                                                      |                 |
|                          | Pineapple sweet orange           | 42         | C. sinensis (L.) Osbeck                      | C. sinensis (L.) Osbeck                  | (C. maxima x C. reticulata) x C. reticulata                                                                                                      |                 |
| Grapefruit               | Duncan grapefruit                | 470        | C. paradisi Macf.                            | C. paradisi Macf.                        | C. maxima x ((C. maxima x C. reticulata) x C. reticulata)                                                                                        |                 |
|                          | Marsh grapefruit                 | 284        | C. paradisi Macf.                            | C. paradisi Macf.                        | C. maxima x ((C. maxima x C. reticulata) x C. reticulata)                                                                                        | (8, 12, 14, 49) |
|                          | Star Ruby grapefruit             | 293        | C. paradisi Macf.                            | C. paradisi Macf.                        | C. maxima x ((C. maxima x C. reticulata) x C. reticulata)                                                                                        |                 |
| Sour orange              | Maroc sour orange                | 122        | C. aurantium L.                              | C. aurantium L.                          | C. maxima x C. reticulata                                                                                                                        |                 |
|                          | Bouquetier de Nice sour orange   | 952        | C. aurantium L.                              | C. aurantium L.                          | C. maxima x C. reticulata                                                                                                                        |                 |
|                          | Granto sour orange               | 870        | C. aurantium L.                              | C. aurantium L.                          | C. maxima x C. reticulata                                                                                                                        |                 |
|                          | Chinotto sour orange             | 752        | C. aurantium L.                              | C. myrtifolia Raf.                       | C. maxima x C. reticulata                                                                                                                        | (8, 12, 14, 49) |
| Lemon                    | Eureka lemon                     | 2          | C. limon (L.) Burm. f.                       | C. limon (L.) Burm. f.                   | (C. maxima x C. reticulata) x C. medica                                                                                                          |                 |
|                          | Meyer lemon                      | 292        | C. limon (L.) Burm. f.                       | C. limon (L.) Burm. f.                   | (C. maxima x C. reticulata) x C. medica or ((C. maxima x C. reticulata) x C. reticulata) x C. medica                                             |                 |
|                          | Rough lemon                      | 778        | C. limon (L.) Burm. f.                       | C. lambhiri Lush.                        | C. reticulata x C. medica                                                                                                                        |                 |
|                          | Volkamer lemon                   | 729        | C. limon (L.) Burm. f.                       | C. limonia Osbeck                        | C. reticulata x C. medica                                                                                                                        | (49)            |
|                          | Brazil sweet lime                | 829        | C. limon (L.) Burm. f.                       | C. limetta Risso                         | (C. maxima x C. reticulata) x C. medica                                                                                                          |                 |
|                          | Rangpur lime                     | 110050     | C. limon (L.) Burm. f.                       | C. limonia Osbeck                        | C. reticulata x C. medica                                                                                                                        |                 |
|                          | Yellow Rangpur lime              | 944        | C. limon (L.) Burm. f.                       | C. limonia Osbeck                        | C. reticulata x C. medica                                                                                                                        |                 |
|                          | Mexican lime                     | 140        | C. aurantifolia (Christm.) Swing.            | C. aurantifolia (Christm.) Swing.        | C. micrantha x C. medica                                                                                                                         | (14)            |
|                          | Giant Key lime                   | 785        | C. aurantifolia (Christm.) Swing.            | C. aurantifolia (Christm.) Swing.        | C. micrantha x C. medica                                                                                                                         | (49)            |
|                          | Coppenthad lime                  | 838        | C. aurantifolia (Christm.) Swing.            | C. aurantifolia (Christm.) Swing.        | 2 (C. micrantha x C. medica) x C. medica                                                                                                         | (14)            |
| Line                     | Excelsa                          | 110234     | C. aurantifolia (Christm.) Swing.            | C. excelsa Wester                        | C. micrantha x C. medica                                                                                                                         |                 |
|                          | Tahiti lime                      | 58         | C. aurantifolia (Christm.) Swing.            | C. latifolia (Yu. Tan.) Tan.             | ((C. maxima x C. reticulata) x C. medica) x 2 (C. micrantha x C. medica)                                                                         | (49)            |
|                          | Bears lime                       | 616        | C. aurantifolia (Christm.) Swing.            | C. latifolia (Yu. Tan.) Tan.             | ((C. maxima x C. reticulata) x C. medica) x 2 (C. micrantha x C. medica)                                                                         |                 |
| Paleslime sweet lime     | Brazil sweet lime                | 697        | C. aurantifolia (Christm.) Swing.            | C. limettoides Tan.                      | (C. maxima x C. reticulata) x C. medica                                                                                                          | (14, 49)        |
|                          | Paleslime sweet lime             | 802        | C. aurantifolia (Christm.) Swing.            | C. limettoides Tan.                      | (C. maxima x C. reticulata) x C. medica                                                                                                          |                 |
|                          | Alomow                           | 779        | C. aurantifolia (Christm.) Swing.            | C. macrophylla Wester                    | C. micrantha x C. medica                                                                                                                         | (14)            |
| Bergamot                 | Castagnaro Bergamot              | 612        | C. aurantifolia var Bergamia                 | C. bergamia Risso and Poir.              | ((C. maxima x C. reticulata) x C. medica) x (C. maxima x C. reticulata)                                                                          | (49)            |
| Ambycarpa                | Nasnaran mandarin                | 896        | C. reticulata Blanco hybrid                  | C. ambycarpa (Hassk.) Odtse.             | C. micrantha x C. reticulata                                                                                                                     | (14)            |
| Mandarin x citron hybrid | Mandarin x citron hybrid         | 1057       | C. reticulata Blanco var. austera Swing.     | C. reticulata Blanco var. austera Swing. | C. reticulata x C. medica                                                                                                                        | (49)            |
| Ichang                   | Ichang                           | 667        | C. ichangensis Swing.                        | C. ichangensis Swing.                    | ?                                                                                                                                                | -               |
| Halimii                  | Mountain                         | 110302     | C. halimi B.C. Stone (Tan. Class.)           | C. halimi B.C. Stone                     | ?                                                                                                                                                | -               |
| Yuzu                     | Yuzu                             | 846        | C. ichang austera ex. Tan. hybrid            | C. junos Siebold                         | ?                                                                                                                                                | -               |
| Lalipes                  | Khasi                            | 844        | C. lalipes (Swing.) Tan.                     | C. lalipes (Swing.) Tan.                 | ?                                                                                                                                                | -               |

**S1 Table. List of the 61 citrus species investigated in the study and their phylogenetic constitution.**
