# Supplementary material
Source: publisher figshare collection journal article supplement (https://plos.figshare.com/articles/dataset/_/1600585)
Supplement: Supplementary file [file 1]

|                                | Limit of detection<br>(mg/kg) | Limit of quantitation<br>(mg/kg) | Specificity  |                |
|--------------------------------|-------------------------------|----------------------------------|--------------|----------------|
|                                |                               |                                  | Equation     | r <sup>2</sup> |
| <b>Coumarins</b>               |                               |                                  |              |                |
| Umbelliferone                  | 0,01                          | 0,03                             | -            | -              |
| Osthol                         | 0,00                          | 0,01                             | -            | -              |
| Aurapten                       | 0,01                          | 0,03                             | y = 0,0008 x | 0,9969         |
| Epoxyaurapten                  | 0,09                          | 0,30                             | -            | -              |
| Limettin                       | 0,01                          | 0,02                             | -            | -              |
| 5-geranyloxy-7-methoxycoumarin | 0,00                          | 0,01                             | -            | -              |
| <b>Furanocoumarins</b>         |                               |                                  |              |                |
| Psoralen                       | 0,01                          | 0,03                             | -            | -              |
| Bergaptol                      | 0,13                          | 0,43                             | -            | -              |
| Bergapten                      | 0,02                          | 0,06                             | y = 0,0067 x | 0,9990         |
| Isoimperatorin                 | 0,09                          | 0,29                             | -            | -              |
| Oxypeucedanin                  | 0,02                          | 0,05                             | y = 0,0056 x | 0,9989         |
| Oxypeucedanin hydrate          | 0,01                          | 0,04                             | y = 0,0658 x | 0,9951         |
| Bergamottin                    | 0,01                          | 0,02                             | -            | -              |
| Epoxybergamottin               | 0,04                          | 0,12                             | -            | -              |
| 6',7'-dihydroxybergamottin     | 0,62                          | 2,06                             | -            | -              |
| Xanthotoxol                    | 0,01                          | 0,04                             | -            | -              |
| Xanthotoxin                    | 0,01                          | 0,03                             | -            | -              |
| Imperatorin                    | 0,05                          | 0,17                             | -            | -              |
| Heraclenin                     | 0,05                          | 0,15                             | -            | -              |
| Heraclenol                     | 0,08                          | 0,28                             | -            | -              |
| 8-geranyloxypsoralen           | 0,32                          | 1,07                             | y = 0,0935 x | 0,9959         |
| Isopimpinellin                 | 0,02                          | 0,08                             | y = 0,0168 x | 0,9919         |
| Phellopterin                   | 0,17                          | 0,57                             | -            | -              |
| Byakangelicol                  | 0,01                          | 0,02                             | -            | -              |
| Byakangelicin                  | 1,28                          | 4,26                             | -            | -              |
| Cnidilin                       | 0,02                          | 0,08                             | -            | -              |
| Cnidicin                       | 0,31                          | 1,03                             | -            | -              |

**S2 Table. Limits of detection and quantitation of the coumarins and furanocoumarins in the citrus pulp and specificity (equation and coefficient of determination, r<sup>2</sup>) of the UPLC-MS method.**
